# Supplementary material
Source: Springer Nature journal article supplement (https://www.springermedizin.de/resource/supplementary/12887_2006_111_MOESM1_ESM.pdf/9477362)

## Neonatal Subproject

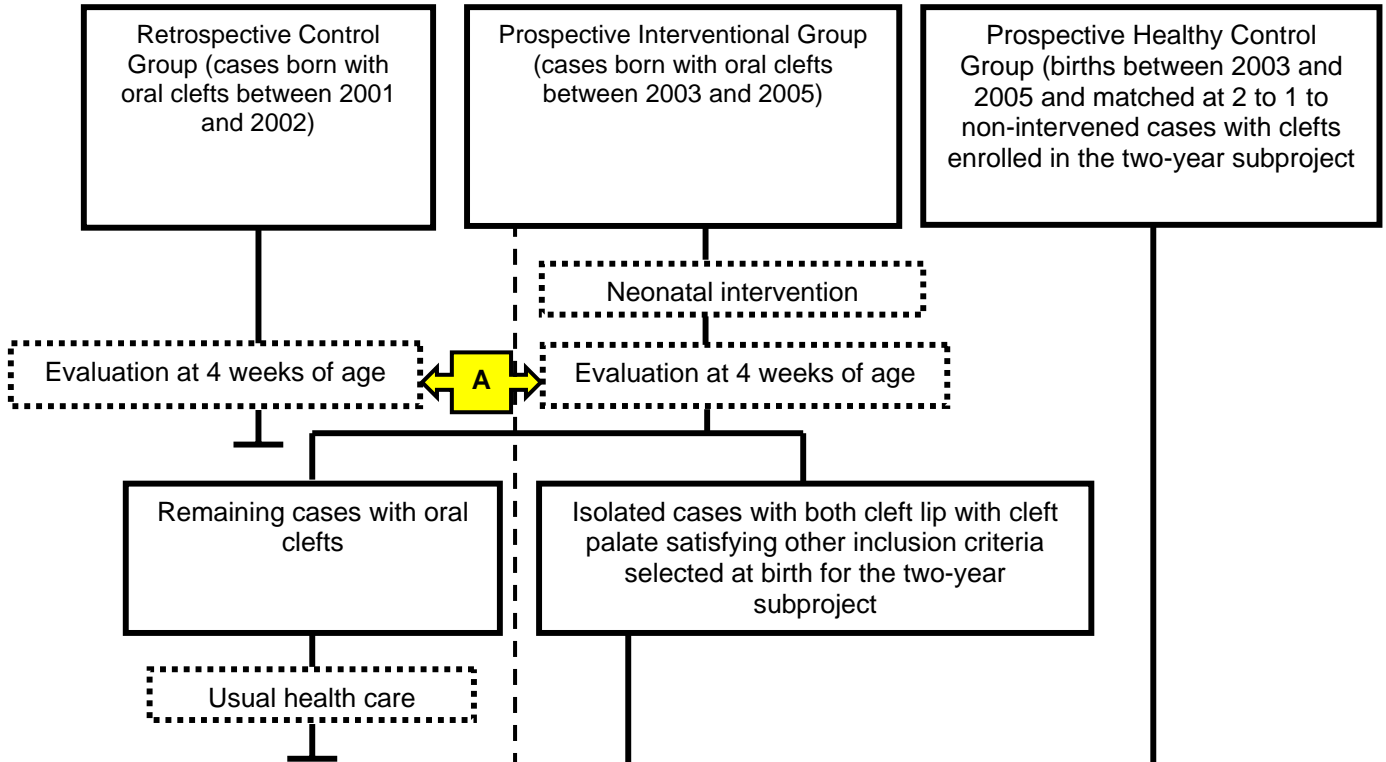

## Two-Year Subproject

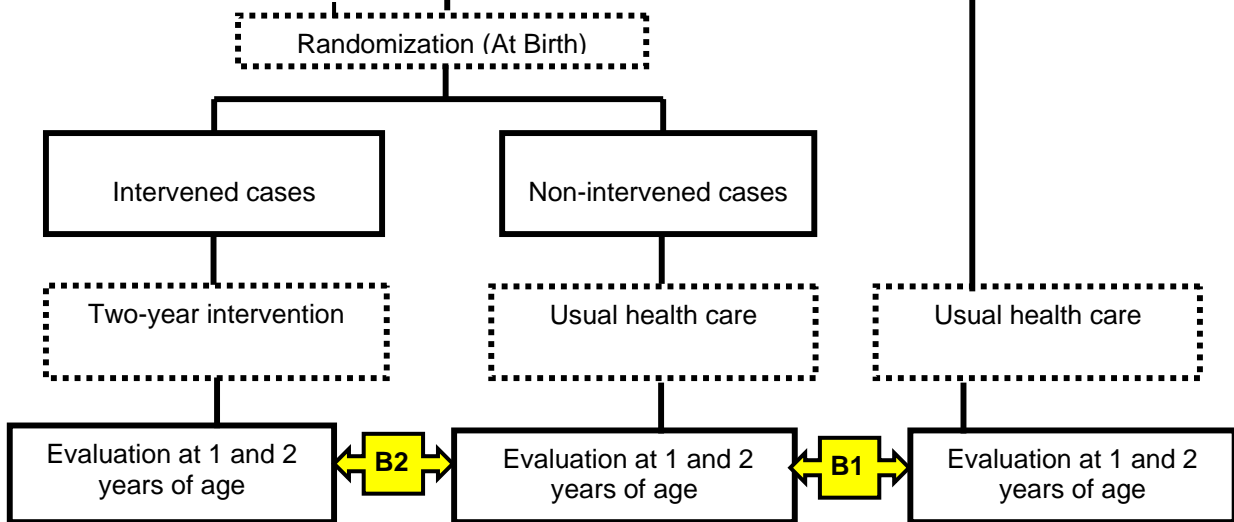

Supplement: MOESM1 [file 9477362]
